# Supplementary material
Source: publisher site journal article supplement (https://www.spandidos-publications.com/1537/downloadSupplementary)
Supplement: Supplementary file 1 [file downloadSupplementary]

## Sheet: 1_KEGG
Table SVI. The pathway enrichment results of 4 modules
Term	ID	Input number	Background number	P-value	Corrected P-value	Input
Complement and coagulation cascades	hsa04610	8	79	2.11247e-15	2.04909e-13	3827|5265|5340|7450|624|718|727|5054
Cytokine-cytokine receptor interaction	hsa04060	9	265	3.84817e-13	1.86636e-11	4283|6352|3627|7852|6387|1950|6364|56477|7422
Chemokine signaling pathway	hsa04062	8	187	1.53672e-12	4.96874e-11	4283|6352|3627|7852|6387|113|56477|6364
Pathways in cancer	hsa05200	8	397	5.17445e-10	1.2548e-08	2335|624|57121|7852|6387|1950|113|7422
Staphylococcus aureus infection	hsa05150	4	57	1.32928e-07	2.5788e-06	727|2359|5340|718
Rheumatoid arthritis	hsa05323	4	91	7.96629e-07	1.28788e-05	6387|6352|7422|6364
HIF-1 signaling pathway	hsa04066	4	103	1.28328e-06	1.61498e-05	5054|7076|1950|7422
Chagas disease (American trypanosomiasis)	hsa05142	4	104	1.33194e-06	1.61498e-05	5054|718|6352|624
PI3K-Akt signaling pathway	hsa04151	5	342	5.83807e-06	6.29214e-05	7450|7422|2335|1950|57121
Intestinal immune network for IgA production	hsa04672	3	50	8.83152e-06	8.56657e-05	7852|6387|56477
Focal adhesion	hsa04510	4	203	1.75357e-05	0.000154633	7422|2335|7450|1950
Rap1 signaling pathway	hsa04015	4	211	2.03448e-05	0.000164454	7422|1950|113|57121
AGE-RAGE signaling pathway in diabetic complications	hsa04933	3	101	6.68949e-05	0.000499139	5054|2335|7422
Toll-like receptor signaling pathway	hsa04620	3	106	7.69223e-05	0.000532962	4283|6352|3627
TNF signaling pathway	hsa04668	3	110	8.56159e-05	0.00055365	6352|3627|6364
Phospholipase D signaling pathway	hsa04072	3	144	0.00018641	0.00113011	1950|113|57121
Influenza A	hsa05164	3	176	0.000332368	0.00189645	6352|5340|3627
Prion diseases	hsa05020	2	35	0.000360021	0.00194012	727|6352
Herpes simplex infection	hsa05168	3	186	0.000389609	0.00198906	727|6352|718
Bladder cancer	hsa05219	2	41	0.000486767	0.00236082	1950|7422
Regulation of actin cytoskeleton	hsa04810	3	215	0.000590397	0.00272707	624|2335|1950
Cytosolic DNA-sensing pathway	hsa04623	2	64	0.00114389	0.00496506	6352|3627
Pancreatic cancer	hsa05212	2	66	0.00121368	0.00496506	1950|7422
Neuroactive ligand-receptor interaction	hsa04080	3	278	0.00122847	0.00496506	2359|5340|624
Pertussis	hsa05133	2	75	0.00155237	0.00602318	727|718
EGFR tyrosine kinase inhibitor resistance	hsa01521	2	81	0.00180038	0.00662267	1950|7422
ECM-receptor interaction	hsa04512	2	82	0.00184342	0.00662267	2335|7450
Gap junction	hsa04540	2	88	0.00211194	0.00731637	1950|113
Inflammatory mediator regulation of TRP channels	hsa04750	2	98	0.00259809	0.00869016	113|624
Leukocyte transendothelial migration	hsa04670	2	118	0.00371269	0.0120044	7852|6387
Platelet activation	hsa04611	2	122	0.003958	0.0123847	7450|113
Systemic lupus erythematosus	hsa05322	2	136	0.00487428	0.0147752	727|718
cGMP-PKG signaling pathway	hsa04022	2	167	0.00721486	0.0212073	113|624
Axon guidance	hsa04360	2	176	0.00797267	0.0227456	7852|6387
Calcium signaling pathway	hsa04020	2	180	0.00832054	0.0230598	113|624
cAMP signaling pathway	hsa04024	2	199	0.0100643	0.0271178	56670|113
Proteoglycans in cancer	hsa05205	2	205	0.0106459	0.0279096	2335|7422
Ras signaling pathway	hsa04014	2	228	0.0130096	0.0332087	1950|7422
Endocytosis	hsa04144	2	260	0.0166412	0.0413898	7852|1950

## Sheet: 2_KEGG
Term	ID	Input number	Background number	P-value	Corrected P-value	Input
Viral myocarditis	hsa05416	8	60	6.06088e-19	1.87887e-17	3383|3122|3115|3113|3135|3134|3133|3106
Allograft rejection	hsa05330	7	39	1.94508e-17	3.01487e-16	3122|3115|3113|3135|3134|3133|3106
Graft-versus-host disease	hsa05332	7	42	3.11976e-17	3.22375e-16	3122|3115|3113|3135|3134|3133|3106
Type I diabetes mellitus	hsa04940	7	44	4.20308e-17	3.25739e-16	3122|3115|3113|3135|3134|3133|3106
Autoimmune thyroid disease	hsa05320	7	54	1.58069e-16	9.8003e-16	3122|3115|3113|3135|3134|3133|3106
Cell adhesion molecules (CAMs)	hsa04514	8	146	5.26561e-16	2.72057e-15	3383|3122|3115|3113|3135|3134|3133|3106
Antigen processing and presentation	hsa04612	7	78	1.77986e-15	7.88225e-15	3122|3115|3113|3135|3134|3133|3106
Epstein-Barr virus infection	hsa05169	8	204	7.0742e-15	2.74125e-14	3383|3122|3115|3113|3135|3134|3133|3106
HTLV-I infection	hsa05166	8	259	4.55891e-14	1.57029e-13	3383|3122|3115|3113|3135|3134|3133|3106
Phagosome	hsa04145	7	155	1.80924e-13	5.60864e-13	3122|3115|3113|3135|3134|3133|3106
Herpes simplex infection	hsa05168	7	186	6.25732e-13	1.76343e-12	3122|3115|3113|3135|3134|3133|3106
Staphylococcus aureus infection	hsa05150	4	57	8.9833e-09	2.32069e-08	3122|3115|3113|3383
Rheumatoid arthritis	hsa05323	4	91	5.43538e-08	1.29613e-07	3122|3115|3113|3383
Natural killer cell mediated cytotoxicity	hsa04650	4	135	2.5156e-07	5.57026e-07	3135|3106|3383|3133
Asthma	hsa05310	3	32	3.46746e-07	7.16608e-07	3122|3115|3113
Influenza A	hsa05164	4	176	7.0746e-07	1.3707e-06	3122|3115|3113|3383
Intestinal immune network for IgA production	hsa04672	3	50	1.23561e-06	2.20939e-06	3122|3115|3113
Viral carcinogenesis	hsa05203	4	205	1.28287e-06	2.20939e-06	3135|3134|3106|3133
Inflammatory bowel disease (IBD)	hsa05321	3	66	2.75272e-06	4.49128e-06	3122|3115|3113
Endocytosis	hsa04144	4	260	3.24233e-06	5.02561e-06	3135|3134|3106|3133
Leishmaniasis	hsa05140	3	74	3.83568e-06	5.6622e-06	3122|3115|3113
Toxoplasmosis	hsa05145	3	119	1.53112e-05	2.15749e-05	3122|3115|3113
Systemic lupus erythematosus	hsa05322	3	136	2.26197e-05	3.04875e-05	3122|3115|3113
Tuberculosis	hsa05152	3	179	5.05027e-05	6.52326e-05	3122|3115|3113
African trypanosomiasis	hsa05143	1	35	0.0143859	0.0178385	3383
Malaria	hsa05144	1	49	0.0199278	0.0237601	3383
Hematopoietic cell lineage	hsa04640	1	88	0.0352125	0.0404291	3122
NF-kappa B signaling pathway	hsa04064	1	93	0.0371558	0.0411368	3383
AGE-RAGE signaling pathway in diabetic complications	hsa04933	1	101	0.0402575	0.0430338	3383
TNF signaling pathway	hsa04668	1	110	0.0437357	0.0451935	3383
Leukocyte transendothelial migration	hsa04670	1	118	0.0468175	0.0468175	3383

## Sheet: 3_KEGG
Term	ID	Input number	Background number	P-value	Corrected P-value	Input
Protein digestion and absorption	hsa04974	8	90	4.97996e-19	5.47795e-18	1285|1284|1286|1282|1288|1277|50509|1290
ECM-receptor interaction	hsa04512	6	82	9.01651e-14	4.95908e-13	1285|1284|1286|1282|1288|1277
Amoebiasis	hsa05146	6	100	2.83163e-13	8.2485e-13	1285|1284|1286|1282|1288|1277
AGE-RAGE signaling pathway in diabetic complications	hsa04933	6	101	2.99945e-13	8.2485e-13	1285|1284|1286|1282|1288|1277
Focal adhesion	hsa04510	6	203	1.76351e-11	3.87972e-11	1285|1284|1286|1282|1288|1277
Small cell lung cancer	hsa05222	5	86	4.38672e-11	8.04232e-11	1285|1284|1286|1288|1282
PI3K-Akt signaling pathway	hsa04151	6	342	3.79974e-10	5.97102e-10	1285|1284|1286|1282|1288|1277
Pathways in cancer	hsa05200	5	397	7.68871e-08	1.0572e-07	1285|1284|1286|1288|1282
Lysine degradation	hsa00310	2	52	0.000118382	0.000144689	8985|5352
Other types of O-glycan biosynthesis	hsa00514	1	31	0.00961375	0.0105751	8985
Platelet activation	hsa04611	1	122	0.0364917	0.0364917	1277

## Sheet: 4_KEGG
Term	ID	Input number	Background number	P-value	Corrected P-value	Input
Ubiquitin mediated proteolysis	hsa04120	3	137	2.36061e-06	9.44246e-06	26232|23327|90293
Aldosterone-regulated sodium reabsorption	hsa04960	1	39	0.0080191	0.0160382	23327
Protein processing in endoplasmic reticulum	hsa04141	1	166	0.0331081	0.0441441	26232
